# Supplementary material
Source: PubMed Central journal article supplement (PMC8866099)

**Appendix Tables 1: Baseline comparison between NSCU and SCU groups after propensity score matching in non-severe patients with COVID-19.**

| Parameters                                  | NSGU <sup>a</sup><br>(n=418) | SGU <sup>a</sup><br>(n=418) | <i>P</i> value <sup>b</sup> | SD <sup>c</sup> |
|---------------------------------------------|------------------------------|-----------------------------|-----------------------------|-----------------|
| Age (years)                                 | 54 (38-66)                   | 53 (38-64)                  | 0.4533                      | -0.052          |
| <b>Laboratory test</b>                      |                              |                             |                             |                 |
| White blood cell count (10 <sup>9</sup> /L) | 5.11 (4.12-6.68)             | 4.94 (3.62-6.66)            | 0.6885                      | -0.030          |
| Albumin(g/L)                                | 39.15 (35.80-42.50)          | 39.40 (35.90-42.70)         | 0.2210                      | 0.088           |
| C-reaction protein (mg/L)                   | 8.73 (1.30-36.80)            | 14.05 (3.60-38.10)          | 0.8132                      | 0.019           |
| <b>Sex</b>                                  |                              |                             | 0.5799                      | -0.038          |
| Female                                      | 217 (51.91)                  | 209 (50.00)                 |                             |                 |
| Male                                        | 201 (48.09)                  | 209 (50.00)                 |                             |                 |
| <b>Symptom</b>                              |                              |                             |                             |                 |
| Cough                                       | 195 (46.65)                  | 201 (48.09)                 | 0.6777                      | -0.029          |
| Fever                                       | 297 (71.05)                  | 297 (71.05)                 | 1.0000                      | 0.000           |
| Anhelation                                  | 40 (9.57)                    | 34 (8.13)                   | 0.4650                      | 0.050           |
| <b>Comorbidity</b>                          |                              |                             |                             |                 |
| Hypertension                                | 139 (33.25)                  | 130 (31.10)                 | 0.5052                      | 0.046           |
| Malignancy                                  | 28 (6.70)                    | 32 (7.66)                   | 0.5920                      | -0.040          |
| Diabetes                                    | 69 (16.51)                   | 61 (14.59)                  | 0.4452                      | 0.054           |
| COPD                                        | 27 (6.46)                    | 26 (6.22)                   | 0.8871                      | 0.010           |
| Coronary heart disease                      | 40 (9.57)                    | 39 (9.33)                   | 0.9059                      | 0.009           |
| <b>Treatment</b>                            |                              |                             |                             |                 |
| Antivirus drugs                             | 397 (94.98)                  | 396 (94.74)                 | 0.8756                      | 0.008           |
| NSAID                                       | 161 (38.52)                  | 173 (41.39)                 | 0.3968                      | -0.064          |
| Antibiotics drugs                           | 390 (93.30)                  | 393 (94.02)                 | 0.6703                      | -0.019          |

NSCU=Non-systemic corticosteroids use; SCU=Systemic corticosteroids use; SD=Standard deviation; COPD=Chronic obstructive pulmonary disease; NSAID= Nonsteroidal anti-inflammatory drug.

<sup>a</sup> Categorical variables are presented as number (percent), and continuous variables are presented as median (interquartile range).

<sup>b</sup> The *P* value was calculated by Chi-square test or Fisher's exact test

<sup>c</sup> SD, Standardized differences be used to compare the mean of baseline covariate between NSCU and SCU group

**Appendix Tables 2: Baseline comparison between NSCU and SCU groups after inverse probability of treatment weighted in non-severe patients with COVID-19.**

| Parameters                                  | NSGU<br>(n=1665)    | SGU<br>(n=1801)     | <i>P</i> value <sup>a</sup> | SD <sup>b</sup> |
|---------------------------------------------|---------------------|---------------------|-----------------------------|-----------------|
| Age (years)                                 | 55 (40-66)          | 56 (42-66)          | 0.0426                      | -0.034          |
| <b>Laboratory test</b>                      |                     |                     |                             |                 |
| White blood cell count (10 <sup>9</sup> /L) | 5.32 (4.19-6.61)    | 4.90 (3.63-6.37)    | 0.1475                      | -0.023          |
| Albumin(g/L)                                | 39.70 (36.30-42.80) | 39.50 (36.00-42.30) | 0.2008                      | 0.065           |
| C-reaction protein (mg/L)                   | 3.60 (0.90-21.30)   | 6.70 (1.00-26.60)   | 0.6349                      | -0.070          |
| <b>Sex</b>                                  |                     |                     |                             |                 |
| Female                                      | 913 (45.83)         | 1068 (59.32)        |                             |                 |
| Male                                        | 752 (45.17)         | 732 (40.68)         |                             |                 |
| <b>Symptom</b>                              |                     |                     |                             |                 |
| Cough                                       | 773 (46.42)         | 814 (45.20)         | 0.4710                      | 0.014           |
| Fever                                       | 1012 (60.77)        | 1047 (58.18)        | 0.1211                      | -0.005          |
| Anhelation                                  | 166 (9.98)          | 224 (12.46)         | 0.0208                      | 0.024           |
| <b>Comorbidity</b>                          |                     |                     |                             |                 |
| Hypertension                                | 535 (32.12)         | 605 (33.45)         | 0.4081                      | 0.020           |
| Malignancy                                  | 97 (5.85)           | 91 (5.05)           | 0.3007                      | -0.014          |
| Diabetes                                    | 257 (15.42)         | 254 (14.11)         | 0.2783                      | 0.041           |
| COPD                                        | 105 (6.32)          | 180 (10.01)         | <0.0001                     | 0.056           |
| Coronary heart disease                      | 147 (8.82)          | 131 (7.28)          | 0.0967                      | 0.067           |
| <b>Treatment</b>                            |                     |                     |                             |                 |
| Antivirus drugs                             | 1475 (88.59)        | 1474 (81.78)        | <0.0001                     | -0.015          |
| NSAID                                       | 472 (28.34)         | 456 (25.31)         | 0.0438                      | 0.015           |
| Antibiotics drugs                           | 1193 (71.65)        | 1189 (66.07)        | 0.0004                      | 0.001           |

NSCU=Non-systemic corticosteroids use; SCU=Systemic corticosteroids use; SD=Standard deviation; COPD=Chronic obstructive pulmonary disease; NSAID= Nonsteroidal anti-inflammatory drug.

<sup>a</sup> Categorical variables are presented as number (percent), and continuous variables are presented as median (interquartile range).

<sup>b</sup> The *P* value was calculated by Chi-square test or Fisher's exact test

<sup>c</sup> SD, Standardized differences be used to compare the mean of baseline covariate between NSGU and SGU group

**Appendix Tables 3. The interaction analysis between the corticosteroids and suspected-influencing factors.**

|                                        | <b>Progression to severe type</b> |                | <b>All-cause death (30 days)</b> |                |
|----------------------------------------|-----------------------------------|----------------|----------------------------------|----------------|
|                                        | <b>OR</b>                         | <b>P value</b> | <b>OR</b>                        | <b>P value</b> |
| Sex*corticosteroids                    | 1.705                             | 0.0918         | 2.612                            | 0.3514         |
| Age*corticosteroids                    | 1.012                             | 0.2151         | 0.956                            | 0.2821         |
| Cough*corticosteroids                  | 0.5814                            | 0.0649         | 0.539                            | 0.5479         |
| Fever*corticosteroids                  | 1.502                             | 0.2358         | 1.199                            | 0.8511         |
| Anhelation*corticosteroids             | 0.510                             | 0.2001         | 0.000                            | 0.9812         |
| Hypertension*corticosteroids           | 0.990                             | 0.9745         | 1.679                            | 0.6494         |
| Diabetes*corticosteroids               | 1.321                             | 0.4951         | 0.619                            | 0.6613         |
| Malignancy*corticosteroids             | 0.667                             | 0.4825         | 1.836                            | 0.7021         |
| Coronary heart disease*corticosteroids | 1.501                             | 0.4274         | 2.735                            | 0.3087         |
| COPD*corticosteroids                   | 1.174                             | 0.7952         | 1.992                            | 0.5471         |
| Antivirus drugs*corticosteroids        | 0.976                             | 0.9724         | 0.919                            | 0.9597         |
| Antibiotics drugs*corticosteroids      | 0.538                             | 0.3322         | 77078.91                         | 0.9459         |
| NSAID*corticosteroids                  | 2.544                             | 0.0045         | 0.137                            | 0.1364         |

COPD=Chronic obstructive pulmonary disease; NSAID= Nonsteroidal anti-inflammatory drug;

<sup>a</sup> Adjust for basic demographic characteristics (age and Sex), symptoms (cough, fever and anhelation), comorbidities (hypertension, diabetes, malignancy, COPD and coronary heart disease ), treatments (antiviral drugs, NSAID and antibiotics drugs), lab data on admission (white blood cell count, albumin, and C-reaction protein).

**Appendix Figure 1: Kaplan-Meier Curves for cumulative probability of all-cause mortality during 30-day follow-up duration in SCU/NSCU groups in PSM (A) and IPTW (B) cohorts.** Abbreviations: SCU=Systemic corticosteroids use; NSCU=Non systemic corticosteroids use; PSM=Propensity score matching; IPTW= Inverse probability of treatment weight.

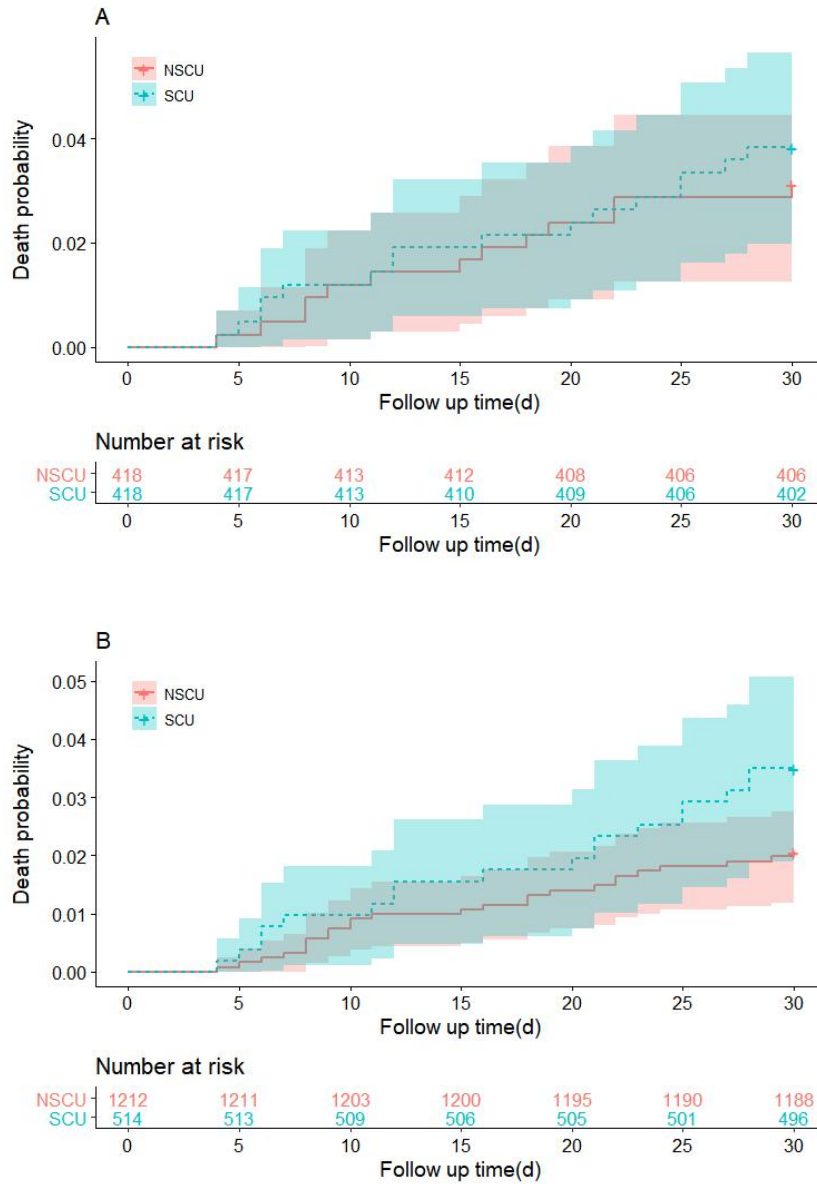

Supplement: mmc1.pdf [file mmc1.pdf]
